# Supplementary material for: A critical role of calcineurin in stress responses, hyphal formation, and virulence of the pathogenic fungus Trichosporon asahii
Source: PubMed Central journal article supplement (PMC9515189; doi:10.1038/s41598-022-20507-x), 2022-09-27
Supplement: 41598_2022_20507_MOESM1_ESM.pdf [file 41598_2022_20507_MOESM1_ESM.pdf]

**Supplementary information**

**A critical role of calcineurin in stress responses, hyphal formation, and virulence of the pathogenic fungus *Trichosporon asahii***

**Yasuhiko Matsumoto<sup>1\*</sup>, Asami Yoshikawa<sup>1</sup>, Tae Nagamachi<sup>1</sup>, Yu Sugiyama<sup>1</sup>, Tsuyoshi Yamada<sup>2,3</sup>, and Takashi Sugita<sup>1</sup>**

<sup>1</sup>Department of Microbiology, Meiji Pharmaceutical University, 2-522-1, Noshio, Kiyose, Tokyo 204-8588, Japan.

<sup>2</sup>Teikyo University Institute of Medical Mycology, 359 Otsuka, Hachioji, Tokyo 192-0395, Japan.

<sup>3</sup>Asia International Institute of Infectious Disease Control, Teikyo University, 2-11-1, Kaga, Itabashi-ku, Tokyo, 173-8605, Japan

\*Address correspondence to: Dr. Yasuhiko Matsumoto, Department of Microbiology, Meiji Pharmaceutical University, 2-522-1, Noshio, Kiyose, Tokyo 204-8588, Japan, Tel: +81-42-495-8745, e-mail: ymatsumoto@my-pharm.ac.jp.

Supplementary table 1 Primers used in this study

| Primers                                                                                                | Nucleic acid sequence                             |
|--------------------------------------------------------------------------------------------------------|---------------------------------------------------|
| pAg1- <i>cnal</i> (5'UTR)- <i>NAT1</i> - <i>cnal</i> (3'UTR)<br>for cloning                            |                                                   |
| <b>pAg1-<i>cnal</i> (5'UTR)-<i>NAT1</i> (1<sup>st</sup> cloning)</b>                                   |                                                   |
| F pAg1 for <i>cnal</i> (5'UTR)                                                                         | CTCCGCTCATGATCAGATTGTCGTTTCCCG                    |
| R <i>NAT1</i> for <i>cnal</i> (5'UTR)                                                                  | GCTGCGAGGATGTGAGCTGGAGAGC                         |
| F <i>cnal</i> (5'UTR)                                                                                  | ATCTGATCATGAGCGGAGCGAGTTGCCAACTG CTGGCGAAGCTTGG   |
| R <i>cnal</i> (5'UTR)                                                                                  | AGCTCACATCCTCGCAGCCCTTGGTGCGCTGTCGGTTCGATGTTTCGC  |
| <b>pAg1-<i>cnal</i>(5'UTR)-<i>NAT1</i>-<i>cnal</i>(3'UTR)<br/>(2<sup>nd</sup> cloning)</b>             |                                                   |
| F pAg1 for <i>cnal</i> (3'UTR)                                                                         | GAAAACCCTGGCGTTACCCAACTTAATCG                     |
| R <i>NAT1</i> for <i>cnal</i> (3'UTR)                                                                  | GAAGAGATGTAGAACTAGCTTCCTGGTTTCAGAG                |
| F <i>cnal</i> (3'UTR)                                                                                  | TAGTTTCTACATCTCTTCCGGCTCGTCGGTGTGGCAAATTGTGGTTCG  |
| R <i>cnal</i> (3'UTR)                                                                                  | GGTAACGCCAGGGTTTTTCGCCTTCTGGCTCGGATGCCTCTCCAAGACC |
| Amplification of <i>cnal</i> cassette for<br>electroporation                                           |                                                   |
| F <i>cnal</i> -cassette                                                                                | ATCTGATCATGAGCGGAGCGAGTTGCCAACTGCTGGCGAAGCTTGG    |
| R <i>cnal</i> -cassette                                                                                | GGTAACGCCAGGGTTTTTCGCCTTCTGGCTCGGATGCCTCTCCAAGACC |
| pAg1- <i>cnal</i> (5'UTR)- <i>cnal</i> - <i>hph</i> -<br><i>cnal</i> (3'UTR) for cloning               |                                                   |
| <b>pAg1-<i>cnal</i>(5'UTR)-<i>hph</i>-<i>cnal</i>(3'UTR)<br/>(1<sup>st</sup> cloning)</b>              |                                                   |
| F 3'UTR-pAg1-5'UTR for <i>hph</i>                                                                      | CGGCTCGTCGGTGTGGCAAATTGTGGTTCG                    |
| R 3'UTR-pAg1-5'UTR for <i>hph</i>                                                                      | CCTTGGTGCCTGTCGGTTCGATGTTTCGC                     |
| F <i>hph</i>                                                                                           | ACCGACAGCGACCAAGGGGGCCCCCTGCGAGGATG               |
| R <i>hph</i>                                                                                           | GCCAACACCGACGAGCCGGGATCCGAAGAGATGTAGAAAC          |
| <b>pAg1-<i>cnal</i>(5'UTR)-<i>cnal</i>-<i>hph</i>-<br/><i>cnal</i>(3'UTR) (2<sup>nd</sup> cloning)</b> |                                                   |
| F <i>hph</i> -3'UTR-pAg1-5'UTR for <i>cnal</i>                                                         | GGGCCCCCTGCGAGGATG                                |
| R <i>hph</i> -3'UTR-pAg1-5'UTR for <i>cnal</i>                                                         | CCTTGGTGCCTGTCGGTTCGATGTTTCGC                     |
| F <i>cnal</i>                                                                                          | ACCGACAGCGACCAAGG ATGACCTCGCCTACCACCCAAACCGCC     |
| R <i>cnal</i>                                                                                          | CATCCTCGCAGGGGGCCC CTTAGGCAATCGAGTTCTCCGGACGCG    |
| Amplification of <i>cnal</i> revertant cassette for                                                    |                                                   |

|                                                                                          |                                                   |
|------------------------------------------------------------------------------------------|---------------------------------------------------|
| electroporation                                                                          |                                                   |
| F <i>cnal</i> revertant-cassette                                                         | ATCTGATCATGAGCGGAGCGAGTTGCCAAACTGCTGGCGAAGCTTGG   |
| R <i>cnal</i> revertant-cassette                                                         | GGTAACGCCAGGGTTTTTCGCCTTCTGGCTCGGATGCCTCTCCAAGACC |
| <b>Primers-1 for <i>cnal</i> genotyping</b>                                              |                                                   |
| F <i>cnal</i> gene locus                                                                 | GCGTATGCACGCACGCACCTTCCTGGG                       |
| R <i>cnal</i> gene locus                                                                 | AGTCTCCCCCTCCACCAACCATCCGACCAC                    |
| <b>Primers-2 for <i>cnal</i> genotyping</b>                                              |                                                   |
| F <i>cnal</i> gene ORF                                                                   | GCGAGGGACGATTGACGGAGGAGCAGGC                      |
| R <i>cnal</i> gene ORF                                                                   | GACGACACTCGTGGTTGCCTCGAAGCAGG                     |
| <b>Primers-3 for <i>cnal</i> genotyping</b>                                              |                                                   |
| F <i>cnal</i> gene outside 1                                                             | CACCGAGTGCCAGCTGCATGTTAGCTACCGC                   |
| R <i>cnal</i> gene outside 1                                                             | CTGGTGCGGTACCGGTAAGCCGTGTCGTCAAG                  |
| <b>Primers-4 for <i>cnal</i> genotyping</b>                                              |                                                   |
| F <i>cnal</i> gene outside 2                                                             | GGACGGCGAGCAGGCGCTCTACATGAGC                      |
| R <i>cnal</i> gene outside 2                                                             | GGCGATTACGTACGGCGTCTTCGAGCGCG                     |
| <b>Primers-5 for <i>cnal</i> genotyping</b>                                              |                                                   |
| F <i>cnal</i> gene outside 1                                                             | CACCGAGTGCCAGCTGCATGTTAGCTACCGC                   |
| R <i>cnal</i> gene outside 3                                                             | CCGAGAGCTGCATCAGGTCGGAGACGC                       |
| <b>Primers-6 for <i>cnal</i> genotyping</b>                                              |                                                   |
| F <i>cnal</i> gene outside 3                                                             | CAGGGTCGATGCGACGCAATCGTCCGATCC                    |
| R <i>cnal</i> gene outside 2                                                             | GGCGATTACGTACGGCGTCTTCGAGCGCG                     |
| pAg1- <i>cnb1</i> (5'UTR)- <i>NAT1</i> - <i>cnb1</i> (3'UTR)<br>for cloning              |                                                   |
| F <i>cnb1</i> (5'UTR)                                                                    | TGAACTAGTCCGTGATCTGCTGCACGTTCCGGGTCC              |
| R <i>cnb1</i> (5'UTR)                                                                    | AAAGGGCCCAAGATCTAGTGATAGATGTGTGGAGA               |
| F <i>cnb1</i> (3'UTR)                                                                    | CTGGGATCCGCGCGCACACACGGATGTGAGCGTAA               |
| R <i>cnb1</i> (3'UTR)                                                                    | CGCGGTACCACTGTTACCTCTGGCATTGTTACGA                |
| Amplification of <i>cnal</i> cassette for<br>electroporation                             |                                                   |
| F <i>cnb1</i> -cassette                                                                  | CCGTGATCTGCTGCACGTTCCGGTCCG                       |
| R <i>cnb1</i> -cassette                                                                  | CTGTTACCTCTGGCTACGACCCCTCCTC                      |
| pAg1- <i>cnb1</i> (5'UTR)- <i>cnb1</i> - <i>hph</i> -<br><i>cnb1</i> (3'UTR) for cloning |                                                   |

|                                             |                                      |
|---------------------------------------------|--------------------------------------|
| <b><i>cnb1</i> 5'-UTR/ORF fragment</b>      |                                      |
| <b>1st PCR</b>                              |                                      |
| TaCNA-F1/SpeI                               | TGAACTAGTCCGTGATCTGCTGCACGTTCCGGGTCC |
| TaCNB-R2(-KpnI)                             | GTGCGTGCGCGGTACTCACGATCGGTGTAATAGC   |
| TaCNB-F2(-KpnI)                             | GCTATTACACCGATCGTGAGTACCGCGCACGCAC   |
| TaCNB-R6/ApaI                               | TACGCTCACATCCGTGTTTGGGCCCTTAGAACAGG  |
| <b>2nd PCR (overlapping PCR)</b>            |                                      |
| TaCNA-F1/SpeI                               | TGAACTAGTCCGTGATCTGCTGCACGTTCCGGGTCC |
| TaCNB-R6/ApaI                               | TACGCTCACATCCGTGTTTGGGCCCTTAGAACAGG  |
| <b><i>hph</i> cassette</b>                  |                                      |
| <b>1st PCR</b>                              |                                      |
| CnPactin(F)ApaI                             | TTTGGGCCCCCTGCGAGGATGTGAGCTGGAGAGCG  |
| CnPact-hph(R)                               | GAGTTCAGGCTTTTTCATACGCGTAGACATGTTGG  |
| CnPact-hph(F)                               | CCAACATGTCTACGCGTATGAAAAAGCCTGAACTC  |
| hph-Ttrp1(R)                                | ACCGCCTTCACGAATTCCTATTCCTTTGCCCTCGG  |
| hph-Ttrp1(F)                                | CCGAGGGCAAAGGAATAGGAATTCGTGAAGGCGGT  |
| Ttrp1(R)BamHI                               | AAAGGATCCGAAGAGATGTAGAAACTAGC        |
| <b>2nd PCR (overlapping PCR)</b>            |                                      |
| CnPactin(F)ApaI                             | TTTGGGCCCCCTGCGAGGATGTGAGCTGGAGAGCG  |
| Ttrp1(R)BamHI                               | AAAGGATCCGAAGAGATGTAGAAACTAGC        |
| <b>Primers-1 for <i>cnb1</i> genotyping</b> |                                      |
| F <i>cnb1</i> gene locus                    | GGAGTGAAGAAGGGCAGAGAGCAACAACAGCGGT   |
| R <i>cnb1</i> gene locus                    | CCGTGATCGCATGGGGCGTGCACAAAGTG        |
| <b>Primers-2 for <i>cnb1</i> genotyping</b> |                                      |
| F <i>cnb1</i> gene ORF                      | CGGCTCGGGTACGGTAGACTTCCAGGAGTTTGTCTG |
| R <i>cnb1</i> gene ORF                      | AACAGGTCCTCGAGCGTCATCTGCTTGACGATGT   |
| <b>Primers-3 for <i>cnb1</i> genotyping</b> |                                      |
| F <i>cnb1</i> gene outside 1                | CATATCCCTCACGTTGCGGTCGAGCGCC         |
| R <i>cnb1</i> gene outside 1                | CTGGTGCGGTACCGGTAAGCCGTGTCGTC AAG    |

|                                             |                                   |
|---------------------------------------------|-----------------------------------|
| <b>Primers-4 for <i>cnb1</i> genotyping</b> |                                   |
| F <i>cnb1</i> gene outside 2                | GGACGGCGAGCAGGCGCTCTACATGAGC      |
| R <i>cnb1</i> gene outside 2                | CTGAGTCCCATCGGCCCTTGCCTTCAAGCTACC |
| <b>Primers-5 for <i>cnb1</i> genotyping</b> |                                   |
| F <i>cnb1</i> gene outside 1                | CATATCCCTCACGTTGCGGTCGAGCGCC      |
| R <i>cnb1</i> gene outside 3                | CCGAGAGCTGCATCAGGTCGGAGACGC       |
| <b>Primers-6 for <i>cnb1</i> genotyping</b> |                                   |
| F <i>cnb1</i> gene outside 3                | CAGGGTCGATGCGACGCAATCGTCCGATCC    |
| R <i>cnb1</i> gene outside 2                | CTGAGTCCCATCGGCCCTTGCCTTCAAGCTACC |
| <b>RT-primers-1 for RT-PCR</b>              |                                   |
| <i>FHXL1</i>                                | AACGCTCACCTCCGCTGGCGCG            |
| <i>RHXL1</i> (intact)                       | GGGGGCAGGCGACGAGATGGGAGTGC        |
| <b>RT-primers-2 for RT-PCR</b>              |                                   |
| <i>FHXL1</i>                                | AACGCTCACCTCCGCTGGCGCG            |
| <i>RHXL1</i> (Splicing)                     | GCTGGCAAGTCCCAGTTGATTCCTGTCAAAG   |



**Supplementary Fig. S1 Effect of DTT on the *HXL1* mRNA splicing in *T. asahii*.**

(a) The *HXL1* mRNA splicing by Ire1-mediated UPR signaling in *T. asahii*. (b) Location of the primers for RT-PCR. (c) The *T. asahii* parent strain was incubated on Sabouraud dextrose medium with or without DTT (12 mM) at 37°C for 1 h. Total RNA was extracted according to the general method (NucleoSpin RNA, Takara, Shiga, Japan). Reverse transcription was performed using a kit (ReverTra Ace qPCR RT Master Mix, TOYOBO Co., Ltd., Osaka, Japan). Primers used in the experiments were listed in Supplementary table 1. Control: without DTT. DTT: with DTT (12 mM). Two samples per group were shown. (d) The *T. asahii* parent strain (Parent), the *cnal* gene-deficient mutant ( $\Delta cnal$ ), the revertant of  $\Delta cnal$  (CNA1), the *cnbl* gene-deficient mutant ( $\Delta cnbl$ ), and the revertant of  $\Delta cnbl$  (CNB1) was incubated on Sabouraud dextrose medium with or without DTT (12 mM) at 37°C for 1 h. Control: without DTT. DTT: with DTT (12 mM).

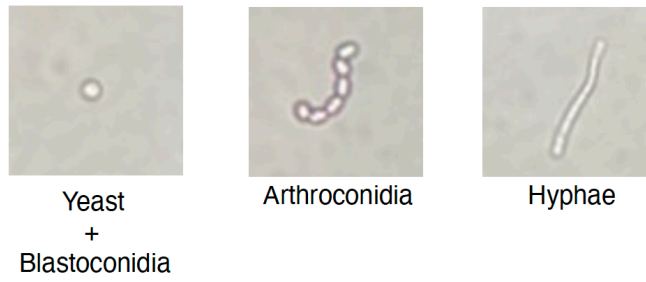

**Supplementary Fig. S2 The representative cells to determine the cell types.**



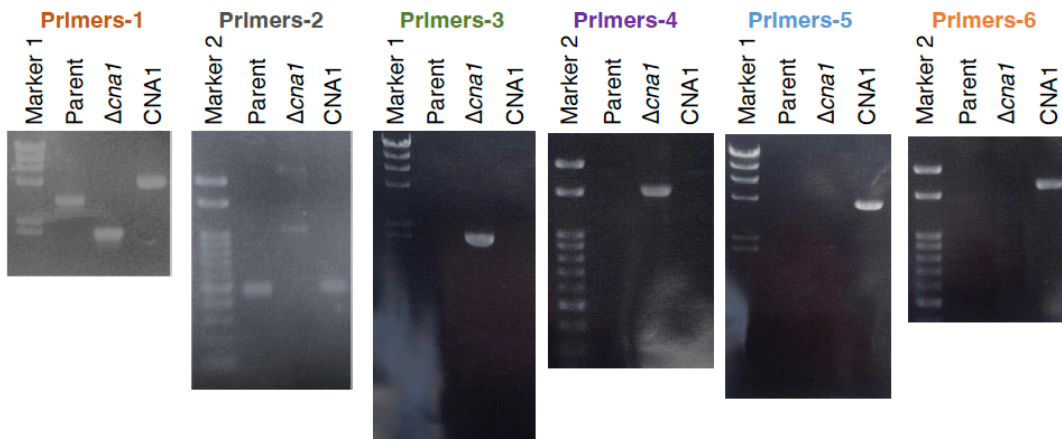

**Figure 1D**

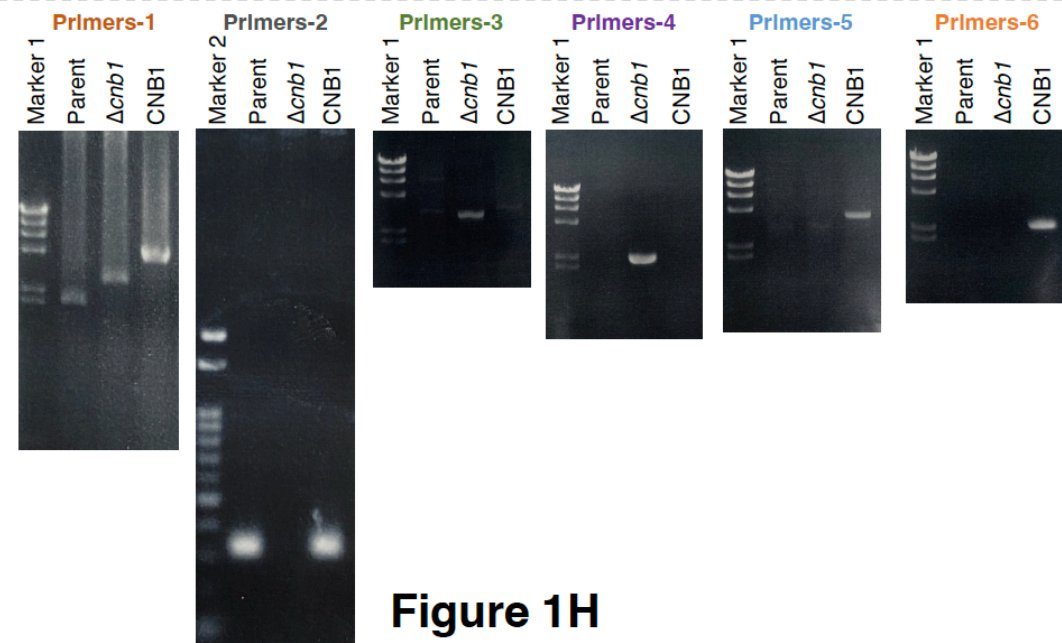

**Figure 1H**

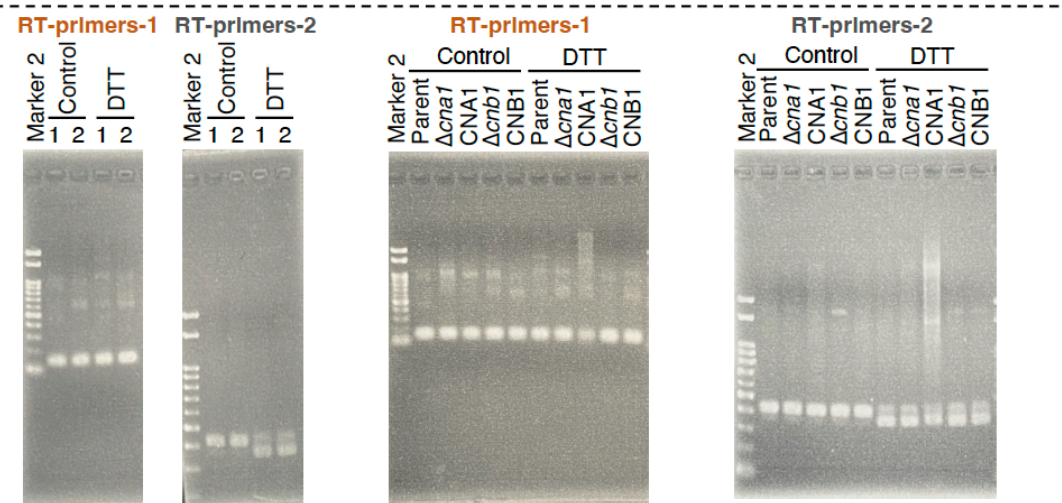

**Supplementary Fig. S1**

**Supplementary Fig. S3 Full-length blots of Figure 1d and 1h.** Marker 1: OneSTEP Marker 1( $\lambda$  /HindIII digest) (Nippon Gene Co., Ltd., Tokyo, Japan), Marker 2: Gene Ladder 100 (Nippon Gene Co., Ltd., Tokyo, Japan).
